# Supplementary material
Source: publisher figshare collection journal article supplement (https://sage.figshare.com/ndownloader/files/12370886)
Supplement: Supplementary file 1 [file 12370886]

**Table S1. Glossary of Terms**

| <b>Term</b>            | <b>Definition</b>                                                                                                        | <b>Example</b>                                                                                                                                                   |
|------------------------|--------------------------------------------------------------------------------------------------------------------------|------------------------------------------------------------------------------------------------------------------------------------------------------------------|
| Alternative hypothesis | What is expected to be true instead of $H_0$ ; this is usually the research question                                     | $H_a: \mu > 0$                                                                                                                                                   |
| Association            | A relationship between two variables                                                                                     | Linear or nonlinear relationship between age and body weight in young animals                                                                                    |
| Biological replicates  | Biologically distinct samples                                                                                            | Different animals                                                                                                                                                |
| Blocking               | Grouping of subjects with similar responses                                                                              | Different mouse strains                                                                                                                                          |
| Categorical data       | Data that can be divided into groups                                                                                     | Age group                                                                                                                                                        |
| Causation              | One event occurs as a result of another event                                                                            | Toxic response to harmful agent                                                                                                                                  |
| Central tendency       | A typical value in a distribution of values                                                                              | Mean ( $\mu$ ) of a normal distribution                                                                                                                          |
| Confidence interval    | An estimated range of values for a parameter, computed from a sample, that is likely to contain the true parameter value | A 95% confidence interval for the mean of a normal distribution, as calculated from a sample, has a probability of 0.95 of containing the mean of the population |
| Confounding            | The effects of one factor cannot be separated from the effects of another factor                                         | All animals with treatment “A” fed diet “X” and all animals with treatment “B” fed diet “Y”                                                                      |
| Continuous data        | Data that can take any value over a range                                                                                | Body weight                                                                                                                                                      |
| Controlled experiment  | An experiment in which one or more factors are changed while all the other factors are held constant                     | An experiment to compare the effect of diet “Y” to the standard diet “X”                                                                                         |
| Covariate              | A variable that might predict an outcome                                                                                 | Age                                                                                                                                                              |

|                                      |                                                                                                                                |                                                                                                                                 |
|--------------------------------------|--------------------------------------------------------------------------------------------------------------------------------|---------------------------------------------------------------------------------------------------------------------------------|
| Discrete data                        | Data that can only take particular distinct values                                                                             | Number of animals with a lesion                                                                                                 |
| Descriptive statistics               | Numbers that summarize a sample                                                                                                | Mean                                                                                                                            |
| Factor                               | The variable manipulated in an experiment                                                                                      | Dose                                                                                                                            |
| Limit of Blank ( <i>LoB</i> )        | Highest concentration measured using a blank sample with no analyte                                                            | 0.01 mg/L                                                                                                                       |
| Limit of Detection ( <i>LoD</i> )    | The lowest concentration of analyte that can be detected and distinguished from <i>LoB</i>                                     | 0.1 mg/L                                                                                                                        |
| Limit of Quantitation ( <i>LoQ</i> ) | The lowest concentration of analyte that can be detected and reliably measured                                                 | 0.15 mg/L                                                                                                                       |
| Null hypothesis                      | The statement that there is no effect/no difference/no association                                                             | $H_0: \mu = 0$                                                                                                                  |
| Numeric data (Quantitative data)     | Data that can be measured or counted                                                                                           | Body weight                                                                                                                     |
| Ordinal data                         | Data that can be arranged in an order from smallest to largest                                                                 | Severity grade                                                                                                                  |
| Parameter                            | A numerical characteristic that describes a population                                                                         | Mean of a distribution                                                                                                          |
| Population                           | The group of subjects for which inferences are to be made                                                                      | All female B6C3F1 mice in existence                                                                                             |
| P-value                              | The probability that a calculated test statistic is as extreme as, or more extreme than, the observed result if $H_0$ is true. | $p = 0.04$                                                                                                                      |
| Replication                          | Repeating the experiment under the same conditions                                                                             | Conducting the experiment 3 times in the same laboratory                                                                        |
| Reproducibility                      | The degree to which a new study can obtain the same results as found in a previous analysis                                    | Determining whether two different laboratories achieve the same experimental results under very similar experimental conditions |
| Sample                               | A smaller group of a population that represents the population.                                                                | 10 specific female B6C3F1 mice                                                                                                  |

|                      |                                                                                              |                                                                        |
|----------------------|----------------------------------------------------------------------------------------------|------------------------------------------------------------------------|
| Standard deviation   | The average deviation of scores from the mean                                                | 10 ppm                                                                 |
| Standard error       | The standard deviation of the sampling distribution of the mean                              | 5.8 ppm                                                                |
| Statistic            | A number that describes a characteristic of a sample                                         | Mean                                                                   |
| Statistical power    | The probability that a statistical test will reject $H_0$ if $H_0$ is actually false         | 80% power                                                              |
| Statistical test     | A procedure that uses data from a sample to reject or fail to reject $H_0$                   | Welch's t-test                                                         |
| Test statistic       | A number that quantifies the compatibility between the data and $H_0$                        | t-statistic used to compare two groups                                 |
| Transforming data    | Applying a mathematical function to data to improve statistical properties of a distribution | Applying logarithm to help make a skewed distribution look more normal |
| Technical replicates | Repeated measurements on the same sample                                                     | Different blood samples from the same animal                           |
| Variable             | A characteristic                                                                             | Dose                                                                   |
